# Supplementary material for: A comparative electrochemical study of 2H/1T phases of MoS 2 and designing 1T-MoS 2 @Cu 2 S for high-performance supercapacitors
Source: Royal Society of Chemistry journal article supplement (doi:10.1039/d5ta04052c), 2025-01-01
Supplement: d5ta04052c1.pdf [file d5ta04052c1.pdf]

**A Comparative Electrochemical Study of 2H/1T Phases of MoS<sub>2</sub> and Designing 1T-MoS<sub>2</sub>@Cu<sub>2</sub>S for High-Performance Supercapacitor**

Arkapriya Das<sup>a</sup>, Alakananda Paul<sup>a</sup>, Ankita Mondal<sup>a</sup>, Kaushik Pal<sup>b,c</sup>, Bhanu Bhusan Khatua<sup>a\*</sup>

<sup>a</sup> *Materials Science Centre, Indian Institute of Technology Kharagpur, Kharagpur-721302*

<sup>b</sup> *Centre for Nanotechnology, Indian Institute of Technology Roorkee, Roorkee, 247667*

<sup>c</sup> *Department of Mechanical and Industrial Engineering, Indian Institute of Technology Roorkee, Roorkee, 247667*

\*corresponding author

Email id: [khatuabb@matsc.iitkgp.ac.in](mailto:khatuabb@matsc.iitkgp.ac.in)

Contact: (+91) 3222 283982 (off)

## Materials characterization

The X-ray diffraction (XRD) pattern of the prepared composite was recorded by an X'Pert PRO diffractometer (PANalytical, Netherlands) with nickel-filtered Cu K $\alpha$  ( $\lambda = 0.15404$  nm) at a scanning rate of  $0.25^\circ \text{ min}^{-1}$ . FTIR spectroscopic analysis was done using NEXUS 870 FTIR (Thermo Nicolet) to study the characteristic vibration mode of the prepared materials. The morphology of the prepared materials and mapping analysis were investigated using a field emission scanning electron microscope (FE-SEM, MERLIN and Carl Zeiss-SUPRATM 40) and the energy-dispersive X-ray spectroscopy (EDS, Oxford EDS detector). The bulk morphology, SAED pattern, high resolution transmission electron microscope (HRTEM) and elemental mapping of the synthesized material were acquired using a high resolution transmission electron microscope (JEOL, JEM- ARM 300 F2). Raman spectra were recorded from a Raman triple spectrometer (T-64000, HORIBA Jobin Yvon) associated with a synapse detector. X-ray photoelectron spectroscopic (XPS) analysis was done using a PHI 5000 Versa Probe II X-ray photoelectron spectrometer [Al K $\alpha$  source  $\sim 1486$  eV]. The specific surface area and pore size distribution of the prepared materials were estimated using BET (Brunauer-Emmett-Teller) analyser (model: AUTOSORB-1, Quantachrome Instruments, USA). The band gap energy was calculated from the UV-visible spectrum using Agilent Cary 5000 UV-Vis-NIR Spectrophotometer (range  $\sim 175\text{--}3300$  nm). The contact angle measurement was carried out using Surface electro optics Phoenix 300 Touch ( $0\text{--}180^\circ \pm 0.1$  accuracy). The concentration of Mo, Cu and S in the composite was evaluated with inductively coupled plasma atomic emission spectroscopy (ICP-AES) (Perkin Elmer 7000D).

## Morphological analysis

The observed dendritic structure of hy 1T-MoS<sub>2</sub>@Cu<sub>2</sub>S composite arises from a kinetically controlled growth mechanism, specifically driven by diffusion-limited aggregation (DLA)

during hydrothermal synthesis. Under the optimized condition (80 °C),  $\text{Cu}^{2+}$  ions complex with EDA to form  $[\text{Cu}(\text{En})_2]^{2+}$ , which moderates the nucleation rate by gradually releasing  $\text{Cu}^{2+}$  into the system. This slow and directional ion supply promotes anisotropic crystal growth, where new material preferentially deposits at high-energy tips, resulting in branched dendrite formation. Furthermore, the crystal habit of  $\text{Cu}_2\text{S}$  favours growth along specific crystallographic directions due to its inherent lattice anisotropy, reinforcing the formation of tree-like structures rather than isotropic morphologies like nanocubes or nanospheres. In contrast, thermodynamically controlled growth which generally yields nanorods or cubes is avoided here due to the absence of strong facet-capping agents and the dominance of kinetic parameters. Therefore, the dendritic morphology is a result of the synergistic effect of moderate supersaturation, EDA-mediated complexation, and anisotropic lattice growth, all of which are uniquely favoured under the selected reaction conditions.<sup>1</sup>

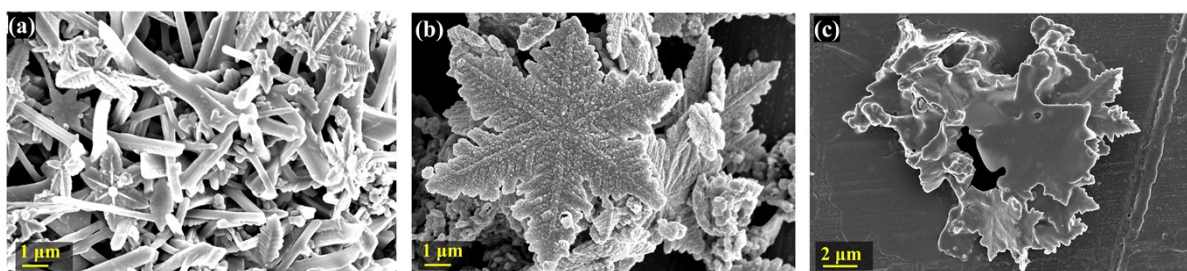

Fig. S1: SEM images of hy-1T MoS2@Cu2S at different temperature (a) 60 °C, (b) 80 °C and, (c) 100 °C

The HRTEM images for both hy-2H MoS2 and hy-1T MoS2 are given below. In the figure it represents the HRTEM images along with the FFT in the inset. From the calculation, the lattice fringe distance for hy-2H MoS2 is  $\sim 0.597$  nm ( $5.97$  Å) and for hy-1T MoS2 is  $\sim 0.805$  nm ( $8.05$  Å). These values are meticulously aligned with the characteristic (002) peak of MoS2. Also, the calculated d spacing values from XRD analysis i.e.  $6.16$  Å and  $8.54$  Å, for hy-2H MoS2 and hy-1T MoS2, respectively, match with lattice fringes distance got from

HRTEM. Hence, successful synthesis of both hy-2H MoS<sub>2</sub> and hy-1T MoS<sub>2</sub> can be said to be confirmed.

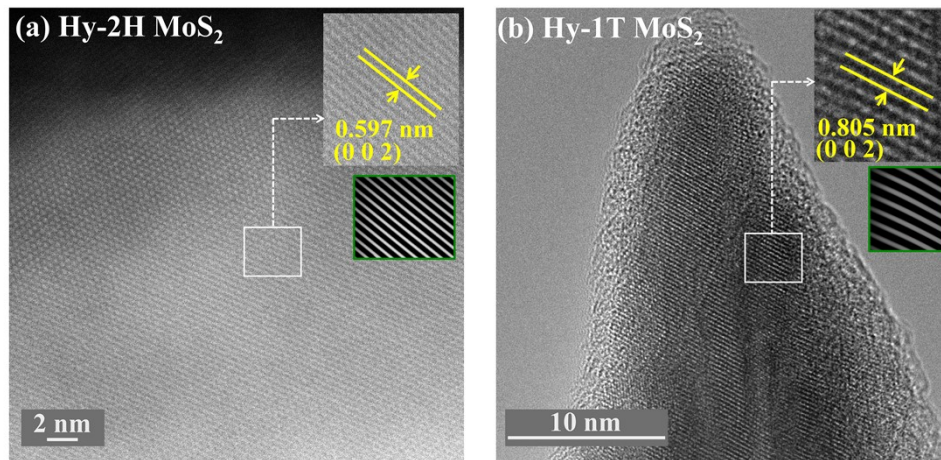

Fig. S2: HRTEM images along with the FFT in the inset (a) Hy-2H MoS<sub>2</sub> and (b) Hy-1T MoS<sub>2</sub>

### XRD analysis

The average interlayer distance ( $d$ ) is calculated from Bragg's equation (eq. 1). The crystallite size is calculated from Scherrer's formula (eq. 2). Micro strain( $\epsilon$ ) and dislocation density ( $\delta$ ) were calculated using the equations (3,4)

$$n\lambda = 2d \sin \theta \quad S1$$

$$D = \frac{K\lambda}{\beta \cos \theta} \quad S2$$

$$\epsilon = \frac{\beta}{4 \tan \theta} \quad S3$$

$$\delta = \frac{1}{D^2} \quad S4$$

$n$  is a positive integer,  $\lambda$  is the wavelength of the X-ray (0.154 nm),  $\theta$  is the diffraction angle.

$D$  is the crystallite size,  $K$  is the Scherrer constant 0.9,  $\lambda$  is the wavelength (0.154 nm),  $\beta$  is the full width of half maxima. All the values are tabulated in Table S1.

**Table S1: Analysis of XRD parameters**

| Composite                                 | d (Å) | D (nm) | $\delta \times 10^{-3}$<br>(lines/nm <sup>2</sup> ) | $\varepsilon \times 10^{-3}$ |
|-------------------------------------------|-------|--------|-----------------------------------------------------|------------------------------|
| Hy-2H MoS <sub>2</sub>                    | 6.16  | 3.83   | 187.91                                              | 53.57                        |
| Hy-1T MoS <sub>2</sub>                    | 8.54  | 3.18   | 159.72                                              | 83.27                        |
| Hy-1T MoS <sub>2</sub> @Cu <sub>2</sub> S | 11.13 | 21.43  | 32.89                                               | 16.56                        |

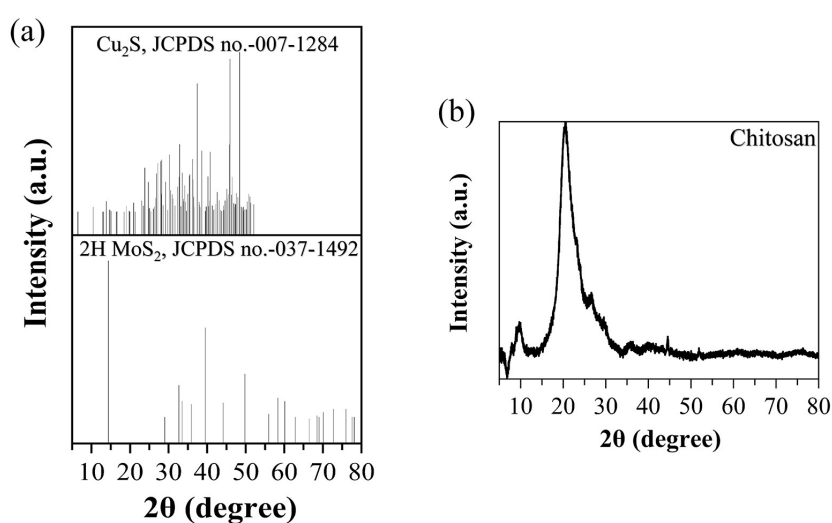**Fig. S3: (a) Standard JCPDS pattern of Cu<sub>2</sub>S and 2H MoS<sub>2</sub>, (b) XRD pattern chitosan**

### FT-IR and BET study

As shown in figure S3a in SI, a broad absorption band near  $\sim 3400\text{ cm}^{-1}$  corresponds to the O–H stretching vibrations of water molecules adsorbed on the metal surface. Additionally, small peaks observed in the range of  $\sim 1620\text{--}1560\text{ cm}^{-1}$  can be attributed to the presence of amide bonds, likely originating from residual chitosan or thiourea in the reaction mixture.<sup>2</sup> The peak near  $\sim 1400\text{ cm}^{-1}$  is associated with the S=O stretching vibration, which may result from aerial oxidation of the sample. Furthermore, the stretching vibration of the C=S bond is evidenced by a small peak in the  $\sim 800\text{--}900\text{ cm}^{-1}$  region, consistently observed across all samples except for bulk-2H MoS<sub>2</sub>. Notably, a peak at  $\sim 480\text{ cm}^{-1}$  corresponds to the Mo–S

stretching vibration in MoS<sub>2</sub>,<sup>3</sup> confirming its structural integrity. In the case of the hy-1T MoS<sub>2</sub>@Cu<sub>2</sub>S composite, the characteristic Cu–S vibrational stretching is identified at ~612 cm<sup>-1</sup>, further supporting the successful incorporation of Cu<sub>2</sub>S into the composite matrix.<sup>3</sup>

To evaluate the accessible surface area and pore size distribution, BET analysis was performed on both the synthesized MoS<sub>2</sub> samples and the composite, as these parameters are crucial in determining the electrochemical efficiency of electrode materials. The nitrogen adsorption-desorption isotherm demonstrated characteristics of a type IV profile, indicative of mesoporous structures. However, minor deviations from the conventional type IV behaviour were observed, likely arising from structural or dynamic modifications occurring within the pores during adsorption and desorption. The isotherm exhibited a capillary condensation step accompanied by an H<sub>3</sub>-type hysteresis loop, further corroborating the presence of mesopores (Figure S3b). From the BJH pore size distribution curve (Figure S3c) it is evident an average pore diameter of all the synthesized materials lies between 16-28 nm (well below 50 nm), which clearly classifies it as mesoporous, as per IUPAC guidelines. The measured surface area and total pore volume of hy-1T MoS<sub>2</sub>@Cu<sub>2</sub>S were determined to be 32 m<sup>2</sup> g<sup>-1</sup> and 0.09 cc g<sup>-1</sup>, respectively, surpassing the values obtained for all MoS<sub>2</sub> samples under investigation (refer to Table S2 in SI). The increased surface area significantly improves electrolyte interaction with the electrode material, thereby enhancing charge storage capabilities. Moreover, the mesoporous architecture facilitates efficient electrolyte penetration through the porous network, which in turn promotes ion transport and contributes to a substantial improvement in C<sub>sp</sub>.

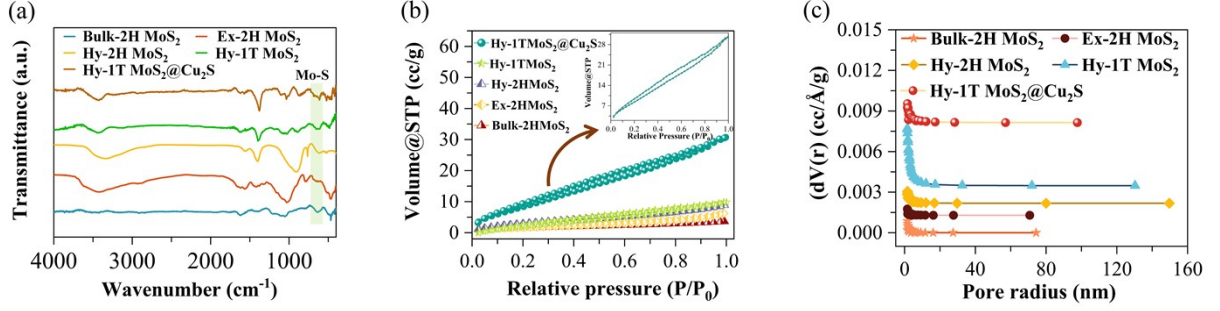

Fig. S4: (a) FT-IR spectra of all the prepared MoS<sub>2</sub> and hy-1T MoS<sub>2</sub>@, (b) adsorption-desorption isotherm with the isolated isotherm of the composite in the inset, and (c) BJH pore size distribution of all the synthesized materials

**Table S2: BET surface area and pore size measurements of all the prepared materials**

| Composites                                | BET surface are<br>(m <sup>2</sup> g <sup>-1</sup> ) | Pore diameter<br>(nm) |
|-------------------------------------------|------------------------------------------------------|-----------------------|
| Bulk-2H MoS <sub>2</sub>                  | 13                                                   | 16.15                 |
| Ex-2H MoS <sub>2</sub>                    | 14                                                   | 16.41                 |
| Hy-2H MoS <sub>2</sub>                    | 16                                                   | 28.04                 |
| Hy-1T MoS <sub>2</sub>                    | 22                                                   | 25.37                 |
| Hy-1T MoS <sub>2</sub> @Cu <sub>2</sub> S | 32                                                   | 22.18                 |

### Band-gap energy calculation

Tauc plot equation for direct allowed transition, (equation S2)

$$(\alpha h\lambda)^{1/n} = A(h\lambda - E_g) \quad S5$$

$\alpha$  is the absorption coefficient,  $h\nu$  is the photon energy,  $A$  is a constant,  $E_g$  is the band gap energy, and  $n=0.5$  for direct allowed transition

### XPS analysis

The figure S3a in SI represents the overall survey scan of the composites in the range of 0-1000 eV. The peaks at 233 eV (Mo 3d) and 160 eV (S 2p) affirm the presence of Mo and S, indicating the successful synthesis of MoS<sub>2</sub> across all samples. Additionally, the Cu 2p peak

~935 eV emerges exclusively in hy-1T $\text{MoS}_2$ @ $\text{Cu}_2\text{S}$  confirming the incorporation of  $\text{Cu}_2\text{S}$  into the composite. The other minor peaks at ~530 eV (O 1s) and 283 eV (C 1s) are due to oxygen and carbon surface contaminants, likely due to atmospheric exposure during sample handling. The S 2p spectrum (figure S3b in SI) further supports the formation of metal-sulfide bonds. The peak at ~163 eV deconvolutes into two distinct signals, S 2p<sub>3/2</sub> (~162.4 eV) and S 2p<sub>1/2</sub> (~164 eV), which are characteristic of sulfur in  $\text{MoS}_2$ .<sup>4</sup> Notably, in hy-1T  $\text{MoS}_2$ @ $\text{Cu}_2\text{S}$ , the S 2p<sub>3/2</sub> peak experiences a subtle shift, likely due to changes in electron density distribution caused by  $\text{Cu}_2\text{S}$  incorporation. This electron redistribution alters the local chemical environment of sulfur atoms, thereby slightly modifying their binding energy. Such shifts often indicate strong electronic coupling between  $\text{Cu}_2\text{S}$  and  $\text{MoS}_2$ , which may enhance charge transfer properties in the composite. The Cu 2p spectrum of hy-1T  $\text{MoS}_2$ @ $\text{Cu}_2\text{S}$  (Figure S3c in SI) presents two well-defined peaks at ~930.1 eV and ~950.1 eV, corresponding to Cu 2p<sub>3/2</sub> and Cu 2p<sub>1/2</sub>, respectively. The observed spin-orbit splitting of ~20 eV is consistent with Cu(I) oxidation state, confirming the formation of  $\text{Cu}_2\text{S}$ .<sup>5</sup> The presence of Cu(I) further reinforces the chemical stability of the composite and suggests a synergistic interaction between  $\text{Cu}_2\text{S}$  and  $\text{MoS}_2$ , which play a crucial role in enhancing electrochemical performance. All the binding energies have been listed below in table S3 in SI.

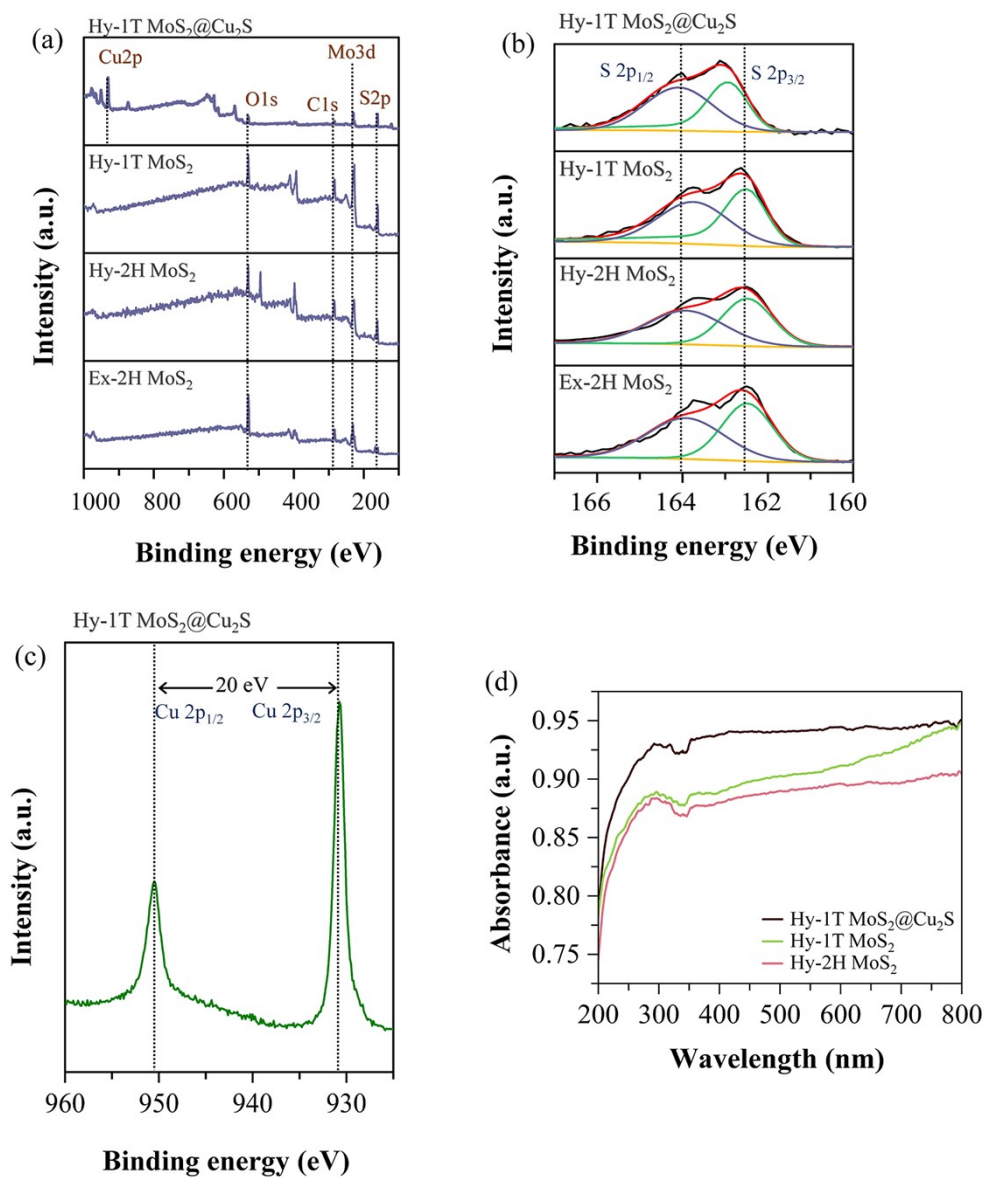

Fig. S5: (a) Survey scan of hy-1T MoS<sub>2</sub>@Cu<sub>2</sub>S, (b) S 2p spectra of all the prepared MoS<sub>2</sub> and hy-1T MoS<sub>2</sub>@Cu<sub>2</sub>S, (c) Cu 2p spectra of hy-1T MoS<sub>2</sub>@Cu<sub>2</sub>S, and (d) UV-Vis spectra of hy-1T MoS<sub>2</sub>@Cu<sub>2</sub>S, hy-1T MoS<sub>2</sub> and hy-2H MoS<sub>2</sub>

**Table S3: Peak positions of each element from CCS@CNT-x**

| Materials                                 | Cu 2p <sub>3/2</sub> (eV) |       | Cu 2p <sub>1/2</sub> (eV) |       |
|-------------------------------------------|---------------------------|-------|---------------------------|-------|
| Hy-1T MoS <sub>2</sub> @Cu <sub>2</sub> S | 930.1 eV                  |       | 950.1 eV                  |       |
| Materials                                 | Mo 3d <sub>3/2</sub> (eV) |       | Mo 3d <sub>5/2</sub> (eV) |       |
|                                           | 2H                        | 1T    | 2H                        | 1T    |
| Ex-2H MoS <sub>2</sub>                    | 233.9                     | -     | 230.7                     | 229.1 |
| Hy-2H MoS <sub>2</sub>                    | 233.7                     | -     | 230.5                     | 228.9 |
| Hy-1T MoS <sub>2</sub>                    | 234                       | 233   | 230.6                     | 229.7 |
| Hy-1T MoS <sub>2</sub> @Cu <sub>2</sub> S | 233.9                     | 232.8 | 230.5                     | 229.6 |
| Composite                                 | S 2p <sub>3/2</sub> (eV)  |       | S 2p <sub>1/2</sub> (eV)  |       |
| Ex-2H MoS <sub>2</sub>                    | 162.9                     |       | 164                       |       |
| Hy-2H MoS <sub>2</sub>                    | 162.5                     |       | 164                       |       |
| Hy-1T MoS <sub>2</sub>                    | 162.4                     |       | 163.7                     |       |
| Hy-1T MoS <sub>2</sub> @Cu <sub>2</sub> S | 162.4                     |       | 164.1                     |       |

**Electrochemical characterization**

The electrochemical measurements such as cyclic voltammetry (CV), chronopotentiometry i.e. galvanostatic charge-discharge (GCD), electrochemical impedance spectroscopy (EIS) and linear sweep voltammetry (LSV) were measured using CHI760E electrochemical instrument.

**Electrode fabrication for supercapacitor application**

The working electrode was prepared by mixing active materials with carbon black as conductive support and PVDF as binder in a ratio of 8:1:1 (w/w/w) in the presence of NMP solvent to form a slurry. The prepared homogeneous paste was then slowly casted on 1.5 × 1.5 cm<sup>2</sup> stainless steel (SS) sheet (thickness 0.116 mm) and dried completely in open air for 24 h. The mass loading of hy-1T MoS<sub>2</sub>@Cu<sub>2</sub>S was ~ 12 mg. SS was cleaned thoroughly

using ultrasonication prior to use as a current collector. A three-electrode set-up was formed using Pt and Ag/AgCl electrode as counter and reference electrode, respectively and 2 M KOH as the supporting electrolyte for the investigation of the electrode performance.

The specific capacitance and areal capacitance of all the CCS@CNT-x composites was calculated using equation S6a and S6b respectively

$$C_{sp} = \frac{i}{m} \times \frac{\Delta t}{\Delta V} \quad S6a$$

$$C_{sp(areal)} = \frac{i}{A} \times \frac{\Delta t}{\Delta V} \quad S6b$$

where,  $C_{sp}$  is specific capacitance in  $F\ g^{-1}$ ,  $i/m$  is the applied current density in  $A\ g^{-1}$ ,  $\Delta t$  is the discharge time in s,  $\Delta V$  is the voltage window in V,  $C_{sp(areal)}$  is the areal capacitance in  $mF\ cm^{-2}$ ,  $i$  is the input current in A,  $A$  is the area of the current collector in  $cm^2$ .

For the device, a two-electrode set-up was designed. The as-mentioned SS was prepared as working electrode following the same method. hy-1T  $MoS_2@Cu_2S$  was used as anode material and  $MnO_2$  as cathode, coated over SS and separated by PVA-KOH gel.

Precise mass loading of the electrode material is calculated using the charge-balance equation (equation S7) as given below:

$$\frac{m^+}{m^-} = \frac{C^- V^-}{C^+ V^+} \quad S7$$

$m$  is mass of the active electrode materials,  $C$  is the specific capacitance and  $V$  is the voltage window, the superscripts  $+$  and  $-$  denotes positive and negative, respectively. Using this equation, active mass used for the device is 4 mg of hy-1T  $MoS_2@Cu_2S$  and ~18 mg of  $MnO_2$ .

Henceforth, the entire electrochemical measurements, i.e., CV, GCD and EIS were conducted. To effectively manage a supercapacitor's storage capacity and ensure swift energy release, it is crucial to evaluate the energy density ( $E$ ) and power density ( $P$ ) of the device. Those are calculated as per the equations given below (equation S8 and S9)

$$E = \frac{1}{2} \times \frac{C \times V^2}{3.6} \quad \text{S8}$$

$$P = \frac{E \times 3600}{t} \quad \text{S9}$$

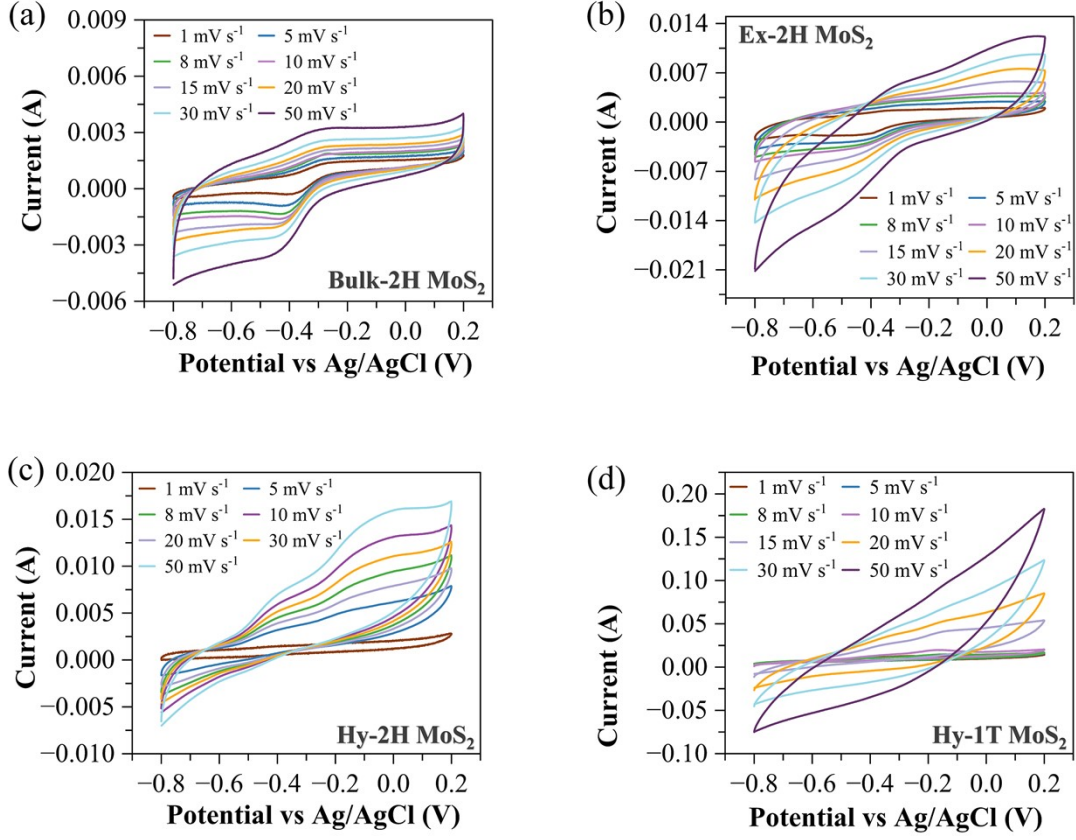

Fig. S6: CV diagram of (a) Bulk-2H MoS<sub>2</sub>, (b) Ex-2H MoS<sub>2</sub>, (c) Hy-2H MoS<sub>2</sub>, and (d) Hy-1T MoS<sub>2</sub>.

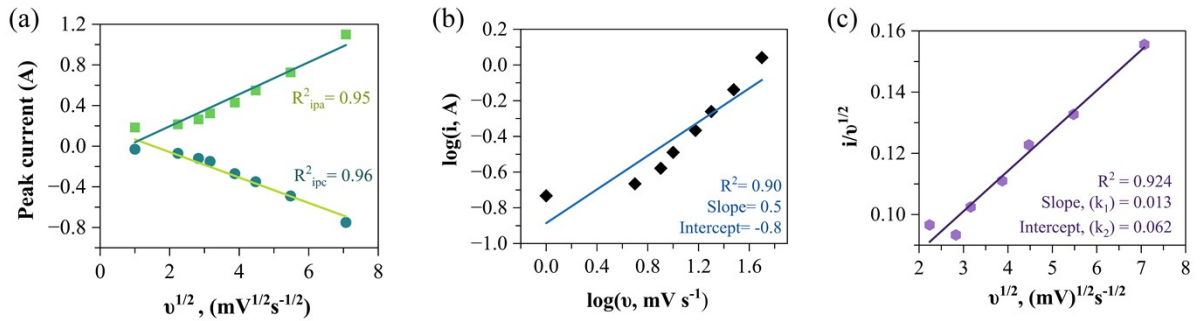

Fig. S7: Electrochemical characterization of hy-1T MoS<sub>2</sub>@Cu<sub>2</sub>S (a) electrokinetic study, (b) calculation of b value, and (c) calculation of k<sub>1</sub> and k<sub>2</sub>.

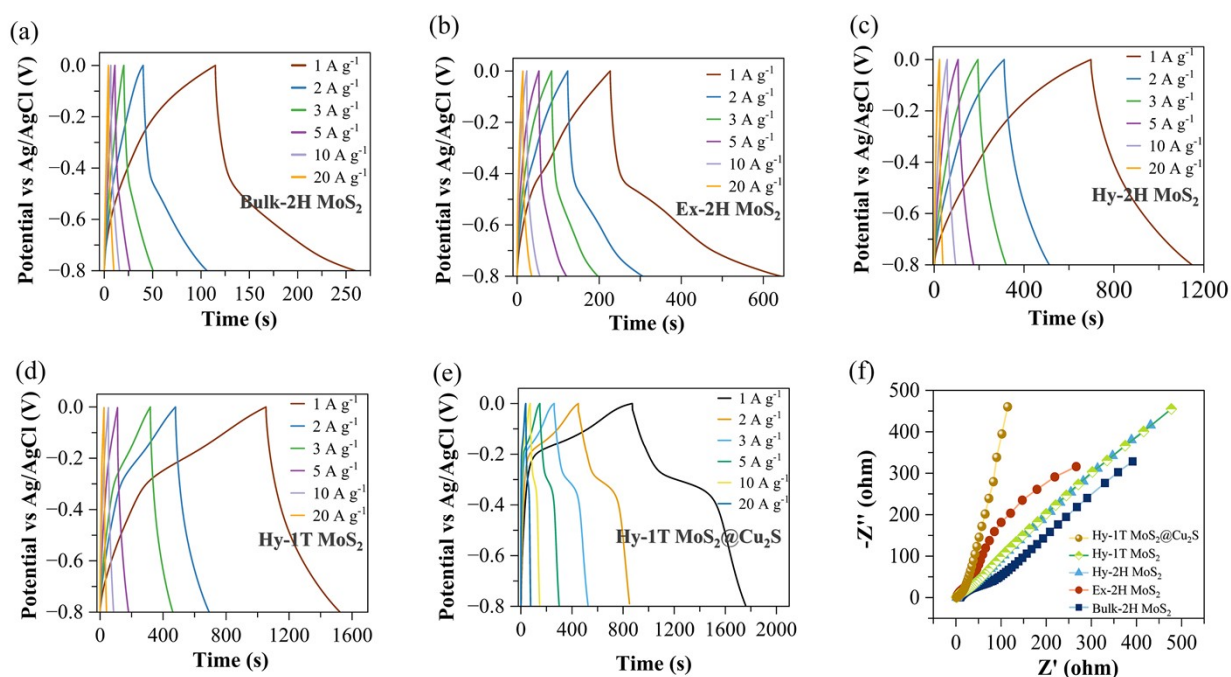

Fig. S8. Comparison among GCD curves of (a) bulk-2H MoS<sub>2</sub>, (b) ex-2H MoS<sub>2</sub>, (c) hy-2H MoS<sub>2</sub>, (d) hy-1T MoS<sub>2</sub>, (e) hy-1T MoS<sub>2</sub>@Cu<sub>2</sub>S at 1 A g<sup>-1</sup> and (f) Nyquist plot.

Table S4a: C<sub>sp</sub> values of CCS@CNT-x in varying current densities

| Current Density<br>A g <sup>-1</sup>      | 1    | 2    | 3   | 5   | 10  | 20  |
|-------------------------------------------|------|------|-----|-----|-----|-----|
| Materials                                 |      |      |     |     |     |     |
| Bulk-2H MoS <sub>2</sub>                  | 178  | 160  | 112 | 100 | 75  | 72  |
| Ex-2H MoS <sub>2</sub>                    | 520  | 460  | 423 | 406 | 312 | 302 |
| Hy-2H MoS <sub>2</sub>                    | 558  | 505  | 480 | 425 | 350 | 325 |
| Hy-1T MoS <sub>2</sub>                    | 585  | 515  | 506 | 437 | 375 | 355 |
| Hy-1T MoS <sub>2</sub> @Cu <sub>2</sub> S | 1118 | 1017 | 986 | 906 | 875 | 850 |

**Table S4b: Areal capacitance values in  $\text{mF cm}^{-2}$  of CCS@CNT-x in varying current densities**

| Current Density<br>$\text{A g}^{-1}$<br>Materials | 1   | 2   | 3   | 5   | 10  | 20  |
|---------------------------------------------------|-----|-----|-----|-----|-----|-----|
| Bulk-2H $\text{MoS}_2$                            | 79  | 71  | 50  | 45  | 33  | 31  |
| Ex-2H $\text{MoS}_2$                              | 231 | 204 | 188 | 180 | 138 | 130 |
| Hy-2H $\text{MoS}_2$                              | 248 | 224 | 213 | 188 | 155 | 143 |
| Hy-1T $\text{MoS}_2$                              | 260 | 228 | 225 | 194 | 166 | 157 |
| Hy-1T $\text{MoS}_2$ @ $\text{Cu}_2\text{S}$      | 497 | 452 | 438 | 402 | 388 | 377 |

**Table S5: Values of solution resistance and charge transfer resistance of CCS@CNT-x**

| Composites                                   | $R_s (\Omega)$ | $R_{ct} (\Omega)$ |
|----------------------------------------------|----------------|-------------------|
| Bulk-2H $\text{MoS}_2$                       | 9.10           | 49.13             |
| Ex-2H $\text{MoS}_2$                         | 2.18           | 26.04             |
| Hy-2H $\text{MoS}_2$                         | 2.16           | 17.10             |
| Hy-1T $\text{MoS}_2$                         | 1.24           | 15.21             |
| Hy-1T $\text{MoS}_2$ @ $\text{Cu}_2\text{S}$ | 1.16           | 8.29              |

**Table S6: A comparison table of electrochemical performance**

| Composite System                          | $C_{sp}$ (F g <sup>-1</sup> ) at 1 A g <sup>-1</sup> | Voltage Window (V) | Morphology                                                              | Energy Storage Mechanism                              | Key Highlights                                                                                                                                                      | Ref              |
|-------------------------------------------|------------------------------------------------------|--------------------|-------------------------------------------------------------------------|-------------------------------------------------------|---------------------------------------------------------------------------------------------------------------------------------------------------------------------|------------------|
| Hy-1T MoS <sub>2</sub> @Cu <sub>2</sub> S | 1118                                                 | 1.0                | Snowflake-like nanosheets                                               | Pseudo-capacitive (battery-type) + fast ion transport | Cu <sub>2</sub> S stabilizes 1T phase of MoS <sub>2</sub> , prevents restacking, enhances conductivity; high-performance from synergistic nanostructure.            | <i>This work</i> |
| TiS <sub>2</sub> /MoS <sub>2</sub>        | 701                                                  | 0.7                | Hierarchical microflower morphology                                     | Pseudo-capacitive                                     | Combination of microspheres and nanosheets increases active surface area but lacks phase stabilization or conductivity control.                                     | 6                |
| SnO <sub>2</sub> -MoS <sub>2</sub>        | 458                                                  | 0.6                | SnO <sub>2</sub> nanoparticle on the surface of MoS <sub>2</sub> sphere | Pseudo-capacitive (battery-type)                      | SnO <sub>2</sub> enhances surface interaction but limited by voltage range and lacks phase-engineered MoS <sub>2</sub> or high active exposure.                     | 7                |
| MoS <sub>2</sub> /Graphene (9:1)          | 295                                                  | 1.0                | Thin flakes uniformly on graphene                                       | EDLC + limited pseudocapacitance                      | Graphene boosts conductivity; overall performance is modest due to weak redox contribution from MoS <sub>2</sub> .                                                  | 8                |
| Mo <sub>2</sub> C@MoS <sub>2</sub>        | -                                                    | -                  | MoS <sub>2</sub> nanosheet grown on Mo <sub>2</sub> C flakes            | Pseudo-capacitive intercalation                       | Mo <sub>2</sub> C acts as conductive scaffold and current collector; strong Mo <sub>2</sub> C-MoS <sub>2</sub> interface enables fast Na <sup>+</sup> intercalation | 9                |

|                                                                    |      |     |                     |                                                |                                                                                                                                                                              |    |
|--------------------------------------------------------------------|------|-----|---------------------|------------------------------------------------|------------------------------------------------------------------------------------------------------------------------------------------------------------------------------|----|
| Petal-like<br>1T-MoS <sub>2</sub>                                  | 466  | 0.3 | Nanoscale<br>petals | Pseudo-<br>capacitive                          | Porous and thin layers<br>improve ion transport<br>but lacks<br>heterojunction design<br>and stability control,<br>and hence very poor<br>voltage window                     | 10 |
| Cu <sub>2</sub> S/<br>MoS <sub>2</sub> @CM<br>@rGO                 | 931  | 0.5 | nanosphere          | Pseudo-<br>capacitive                          | Prevents MoS <sub>2</sub><br>restacking and<br>enhances redox<br>kinetics, but lacks<br>phase control and<br>shows less<br>morphological<br>complexity                       | 3  |
| ethylene<br>glycol<br>intercalated<br>Co doped<br>MoS <sub>2</sub> | 1056 | 1.0 | nanoflakes          | Surface<br>controlled<br>pseudo-<br>capacitive | Hierarchical<br>confinement activates<br>edge and basal sites<br>MoS <sub>2</sub> for fast<br>pseudocapacitive K <sup>+</sup><br>storage, but lacks<br>hybrid-phase synergy. | 11 |

### Comparative study between hy-2H MoS<sub>2</sub>@Cu<sub>2</sub>S and hy-1T MoS<sub>2</sub>@Cu<sub>2</sub>S

The hy-2H MoS<sub>2</sub> was also used as template for fabricating the composite electrode following the same synthesis route in order to provide a comparative understanding of phase-dependent performance. The formation of hy-2H MoS<sub>2</sub>@Cu<sub>2</sub>S is confirmed by the XRD spectra given in Figure S9a, where the characteristic (002) peak of 2H phase is present at  $2\theta \approx 14.2^\circ$ . Afterwards, SEM analysis of this composite confirmed the emergence of a dendritic, snowflake-like morphology. However, the structural features, such as branching density (the length of dendritic petal is  $\sim 0.75$ - $1.5 \mu\text{m}$ ), symmetry, and definition, were notably less pronounced compared to the 1T- MoS<sub>2</sub>@Cu<sub>2</sub>S system (figure S9 b and c). This indicates that while Cu<sub>2</sub>S was able to nucleate and grow on the 2H-MoS<sub>2</sub> surface, the degree of structural anisotropy and interfacial interaction was weaker than in the 1T-based system. This is likely

due to the limited conductivity and lower surface reactivity of 2H- MoS<sub>2</sub>, which may hinder effective nucleation and oriented growth of the Cu<sub>2</sub>S branches.

Electrochemical characterizations further validated these morphological observations. The CV curves (Figure S9 d) clearly showed a smaller enclosed area for the 2H-MoS<sub>2</sub>@Cu<sub>2</sub>S electrode compared to the 1T-based composite, indicating a reduced charge storage capability. Furthermore, GCD analysis revealed a significant voltage drop at the beginning of the discharge curve for the 2H-MoS<sub>2</sub>@Cu<sub>2</sub>S composite (Figure S9 e), which is indicative of higher internal resistance and poor electrochemical reversibility. This large iR drop not only compromises the energy efficiency of the electrode but also directly impacts the calculated C<sub>sp</sub>, which was found to be 542 F g<sup>-1</sup> at 1 A g<sup>-1</sup>, substantially lower than that of the 1T-MoS<sub>2</sub>@Cu<sub>2</sub>S composite (1118 F g<sup>-1</sup>). These findings further underscore the advantage of using the metallic 1T phase of MoS<sub>2</sub>, which not only supports the formation of a more defined dendritic architecture but also facilitates improved charge transport and electrochemical activity in the composite electrode.

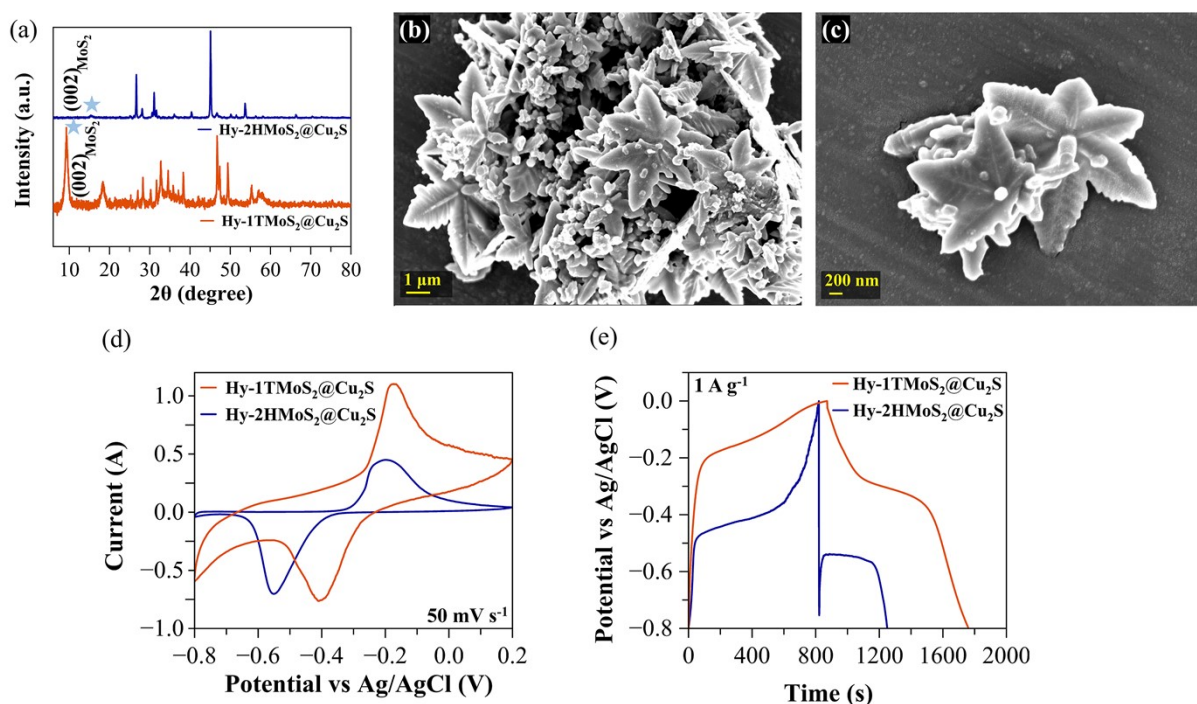

Fig. S9. Comparative study of hy-2HMoS<sub>2</sub>@Cu<sub>2</sub>S and hy-1TMoS<sub>2</sub>@Cu<sub>2</sub>S: (a) XRD spectra showing the presence of characteristic (002) peak of MoS<sub>2</sub>, (b) and (c) SEM images at different magnification, (d) CV curve of both the composite, and (d) GCD curve of both the composite.

## Preparation of MnO<sub>2</sub>

MnO<sub>2</sub> was also synthesized by a hydrothermal method. KMnO<sub>4</sub> and MnCl<sub>2</sub>·4H<sub>2</sub>O were mixed together in water in 2:3 M ratio. After stirring for 30 min the solution was filled in a 50 mL Teflon-lined stainless-steel autoclave and kept in the furnace at 180 °C for 24 h. After cooling at room temperature, it was washed completely with DI water and ethanol.

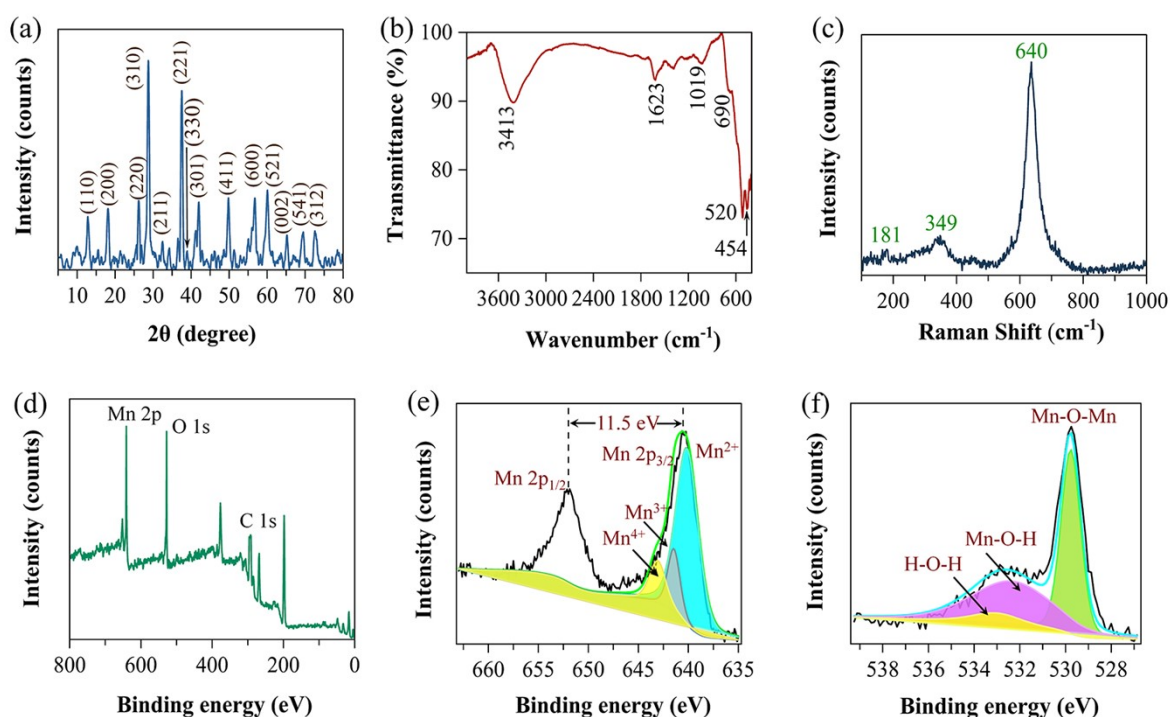

Fig. S10: Characterization of MnO<sub>2</sub> (a) XRD spectra, (b) FT-IR spectra, (c) Raman spectra, (d) XPS overall spectra, (e) Mn 2p spectra and (f) O 1s spectra.

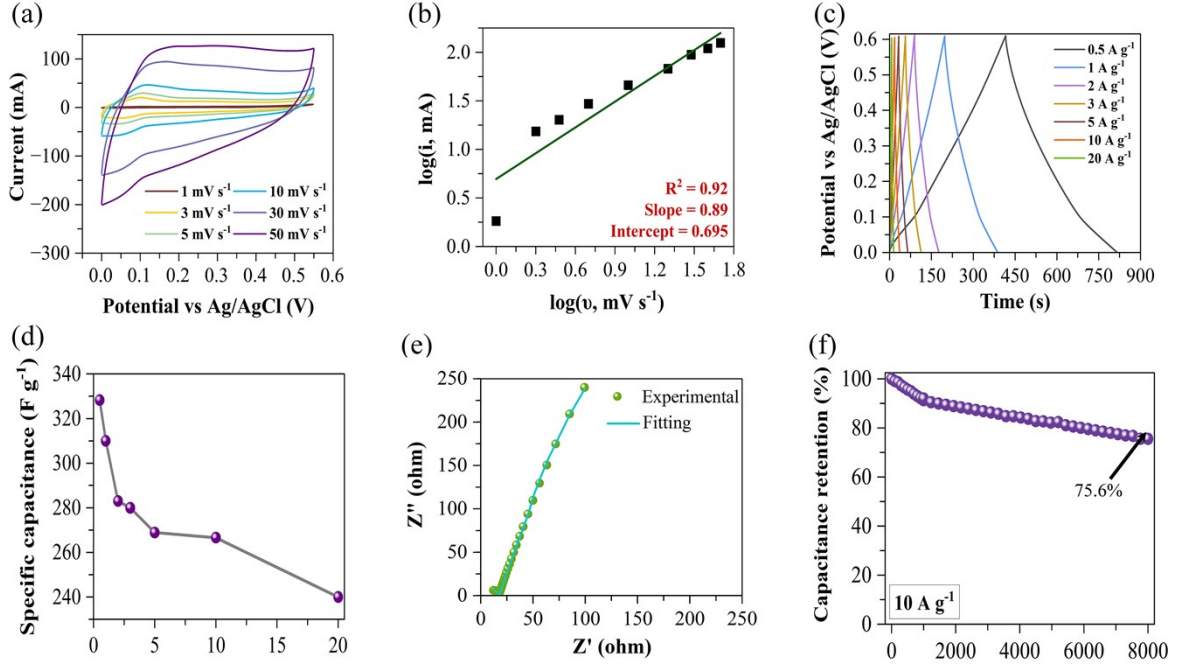

Fig. S11: Electrochemical characterization of  $\text{MnO}_2$  (a) CV diagram, (b) calculation b value, (c) GCD curve, (d)  $C_{\text{sp}}$  values at different current densities, (e) EIS spectra and (f) cycle stability.

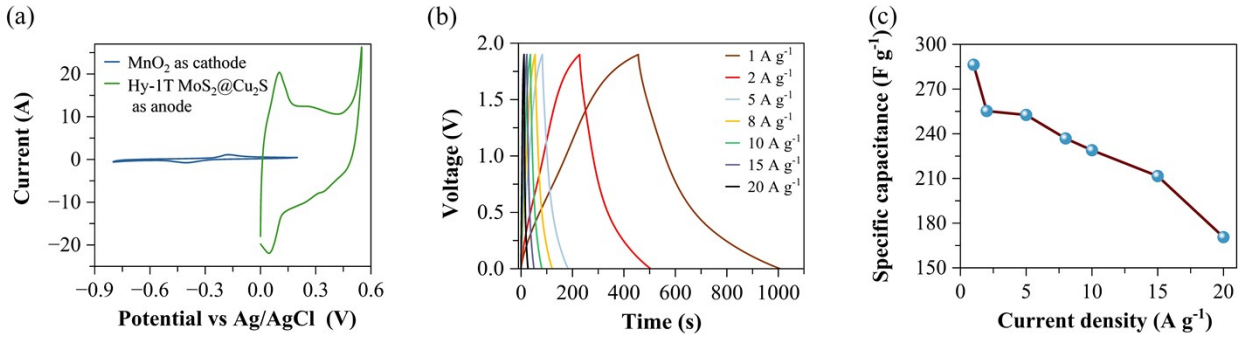

Fig. S12: (a) voltage window comparison of the cathode and anode at  $10 \text{ mV s}^{-1}$ , (b) GCD curves of the device at different current densities, and (c) Study of specific capacitance of the device with respect to varying current density.

### Stress stability test of hy-1T MoS<sub>2</sub>@Cu<sub>2</sub>S//MnO<sub>2</sub>

To evaluate practical feasibility, electrochemical performance of our hy-1T MoS<sub>2</sub>@Cu<sub>2</sub>S//MnO<sub>2</sub> composite device have been performed under various stress conditions:

1. Mechanical Bending Test: We tested the device under a 45° bending angle and recorded the CV curves. The results revealed negligible change in performance, confirming the mechanical robustness of the composite structure under deformation (figure S13a).
2. High-Rate Long-Term Cycling Test at Low Mass Loading: A low mass loading device was cycled at 20 A g<sup>-1</sup> for 15,000 cycles, showing excellent retention (~95%) with minimal performance decay, indicating long-term electrochemical stability.
3. High Mass Loading Test: A device fabricated with high mass loading (~12 mg composite and ~50 mg MnO<sub>2</sub>) was cycled at a high current density of 40 A g<sup>-1</sup> for 8000 cycles. It shows a slight decrease (~70% retention) than the low mass loading cycling test (figure S13b). This reduction in retention is primarily due to well-known limitations associated with thick electrodes, such as sluggish ion diffusion, lower active material utilization, and increased internal resistance.<sup>17</sup> These factors often lead to a drop in performance at high mass loadings. Nonetheless, achieving 70% retention after 8000 cycles under such demanding conditions still reflects the good mechanical and electrochemical stability of our hy-1T MoS<sub>2</sub>@Cu<sub>2</sub>S//MnO<sub>2</sub> system. This performance affirms the structural integrity and long-term durability of the composite. Thus, it shows a promising real-world energy storage application that demand higher material loading.

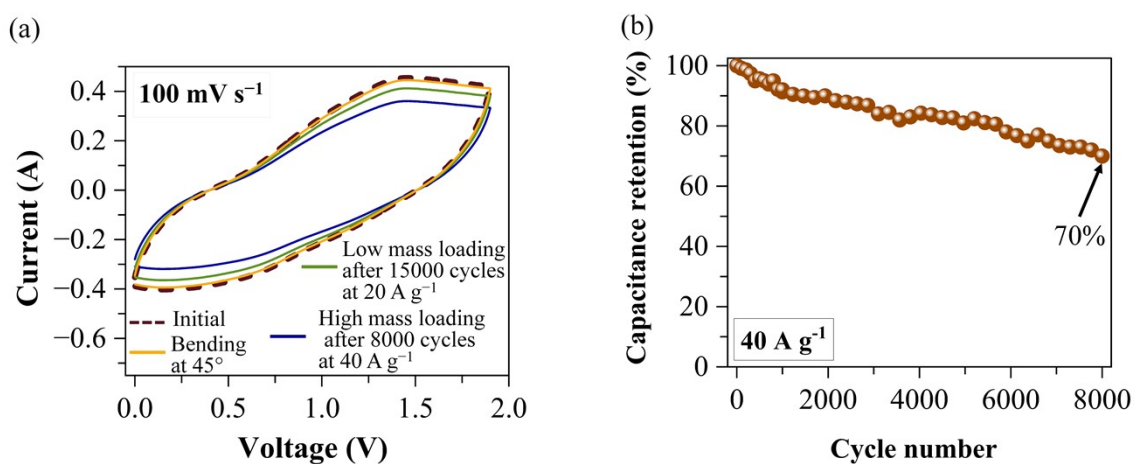

Fig. S13. (a) CV curves after several stress-stability tests and (b) cyclic stability of the device at high mass loading.

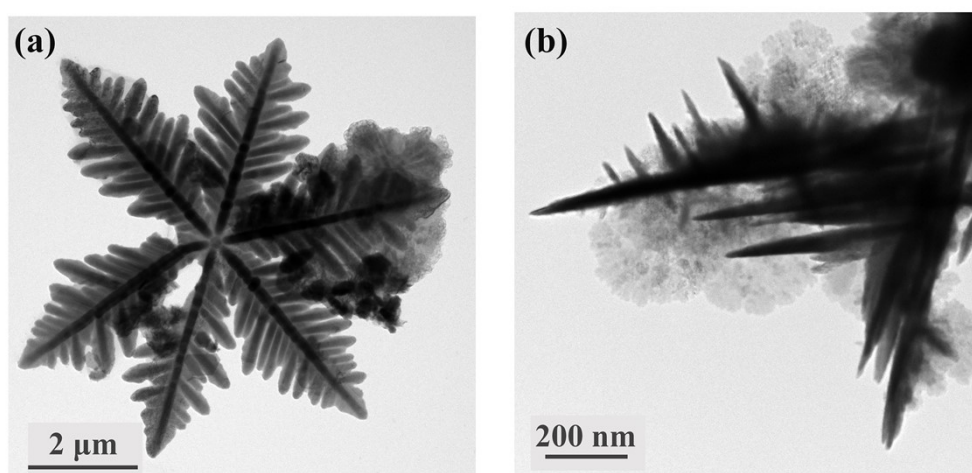

Fig. S14: TEM images after cyclic stability test (a) at  $2 \mu\text{m}$  and (b) at  $200 \text{ nm}$ .

## Reference

1. A. Arneodo, F. Argoul, J. F. Muzy and M. Tabard, *Physica A: Statistical Mechanics and its Applications*, 1992, **188**, 217–242.
2. C. Lustriane, F. Dwivany, V. Suendo and M. Reza, *Journal of Plant Biotechnology*, 2018, **45**, 36–44.
3. H. Xu, Y. Zhang, F. Liu, Z. Yang, J. Xu and J. Liu, *ACS Appl. Nano Mater.*, 2024, **7**, 21340–21350.
4. H. Zhang, L. Deng, J. Chen, Y. Zhang, M. Liu, Y. Han, Y. Chen, H. Zeng and Z. Shi, *Chemical Engineering Journal*, 2022, **446**, 137364.
5. M. Kumar, V. Bhatt, O. S. Nayal, S. Sharma, V. Kumar, M. S. Thakur, N. Kumar, R. Bal, B. Singh and U. Sharma, *Catal. Sci. Technol.*, 2017, **7**, 2857–2864.
6. G. Nabi, W. Ali, M. Tanveer, T. Iqbal, M. Rizwan and S. Hussain, *Journal of Energy Storage*, 2023, **58**, 106316.
7. K. Rafique, N. Hassan, M. Z. U. Shah, S. I. Al-Saeedi, A. Shah, M. S. U. Shah, U. Aziz, M. Sajjad, A. A. Alanazi and H. M. A. Hassan, *Surfaces and Interfaces*, 2024, **44**, 103650.
8. C. S. Bongu, M. R. Krishnan, A. Soliman, M. Arsalan and E. H. Alsharaeh, *ACS Omega*, 2023, **8**, 36789–36800.
9. Z. Khanam, L. Luo, M. Mushtaq, J. Li, H. Yang, T. Ouyang, M.-S. Balogun and A. Pan, *Nano Energy*, 2024, **125**, 109590.
10. M. Mohan, N. P. Shetti and T. M. Aminabhavi, *Journal of Energy Storage*, 2023, **58**, 106321.
11. L. Kang, S. Liu, Q. Zhang, J. Zou, J. Ai, D. Qiao, W. Zhong, Y. Liu, S. C. Jun, Y. Yamauchi and J. Zhang, *ACS Nano*, 2024, **18**, 2149–2161.
12. H. Li, H. Li, Z. Wu, L. Zhu, C. Li, S. Lin, X. Zhu and Y. Sun, *Journal of Materials Science & Technology*, 2022, **123**, 34–40.

13. R. Thangappan, S. Kalaiselvam, A. Elayaperumal, R. Jayavel, M. Arivanandhan, R. Karthikeyan and Y. Hayakawa, *Dalton Trans.*, 2016, **45**, 2637–2646.
14. H. Li, Z. Wei, X. Yuan, Y. Zhao, Q. Jia, Y. Li, D. Ma, B. Li, Y. Zhang and X. Zhu, *Journal of Power Sources*, 2024, **608**, 234648.
15. S. Irfan, M. Aalim, M. H. Flaifel, I. Nazir, M. A. Shah, M. Q. Lone, A. Firdous, A. H. Pandith and G. N. Dar, *Journal of Energy Storage*, 2025, **106**, 114788.
16. X. Wu, X. Yu, Z. Tian, H. Li and J. Xu, *ACS Nano*, 2025, **19**, 9292–9303.
17. C. Mevada and M. Mukhopadhyay, *Ind. Eng. Chem. Res.*, 2021, **60**, 1096–1111.
